# Supplementary material for: Ratiometric Mass Spectrometry for Cell Identification and Quantitation Using Intracellular “Dual-Biomarkers”
Source: PubMed Central journal article supplement (PMC5727126; doi:10.1038/s41598-017-17812-1), 2017-12-12
Supplement: 41598_2017_17812_MOESM1_ESM.pdf [file 41598_2017_17812_MOESM1_ESM.pdf]

# Supporting Information

## Ratiometric Mass Spectrometry for Cell Identification and Quantitation

### Using Intracellular “Dual-Biomarkers”

Xiaoming Chen<sup>1</sup>, Fangjie Wo<sup>1</sup>, Jiang Chen<sup>2</sup>, Jie Tan<sup>1</sup>, Tao Wang<sup>1</sup>, Xiao Liang<sup>2\*</sup>, Jianmin Wu<sup>1\*</sup>

<sup>1</sup>*Institute of Analytical Chemistry, Department of Chemistry, Zhejiang University, Hangzhou, 310058, China*

<sup>2</sup>*Department of General Surgery, Sir Run Run Shaw Hospital, School of Medicine, Zhejiang University, Hangzhou, 310016, China*

**\*Corresponding author:** Jianmin Wu, e-mail: [wjm-st1@zju.edu.cn](mailto:wjm-st1@zju.edu.cn)

## Table of Contents

- Supplemental Figure S1** Normalized MALDI mass spectra of HepG2 cells with different organic matrix
- Supplemental Figure S2** Typical Normalized MALDI mass spectra of HepG2 cells acquired in different independent tests
- Supplemental Figure S3** Normalized MALDI mass spectra of five types of hepatocellular cancer cells (HCC cells)
- Supplemental Figure S4** Normalized MALDI mass spectra of five types HCC cells cultured in DMEM, MEM and RPMI 1640 media.
- Supplemental Figure S5** Principle component analysis (PCA) of cell mixture and pure cells
- Supplemental Figure S6** Magnified mass spectra of five type HCC cells at 11 pairs of dual-peaks whose RSD < 25% in each type of cells
- Supplemental Figure S7** Magnified mass spectra at  $m/z = 4962$  vs  $4936$  and  $m/z = 10088$  vs  $9952$  of five type HCC cells cultured in three different media
- Supplemental Figure S8** Typical normalized MALDI mass spectra of LM3, Huh7, mixture of Huh7 and LM3 with ratio = 1:1 cultured in DMEM
- Supplemental Figure S9** The relationship between peak intensity ratio and cell mixture composition of Huh7 and HepG2 cells, Hep3B and HepG2
- Supplemental Figure S10** Ratio of two ratio values (Ratio 1 =  $I_{(m/z = 4962)} / I_{(m/z = 4936)}$ , Ratio 2 =  $I_{(m/z = 10088)} / I_{(m/z = 9952)}$ ) in five types of HCC cells and the  $P$  values between different types of cells
- Supplemental Figure S11** MALDI mass spectra of the tissues originated from pure Huh7 cells, LM3 cells, mixed cells with a ratio of Huh7/LM3 = 3:1, nude mice muscle and liver tissue
- Supplemental Figure S12** LC/MS MS identification of thymosin  $\beta$  4 and thymosin  $\beta$  10
- Supplemental Table S1** Normalized intensity of 70 feature peaks from the mass spectra of five types of HCC cells selected by ClinproTools software
- Supplemental Table S2**  $P$  value calculated with Student's test of the 11 dual-peaks between each two classes of five types of HCC cells
- Supplemental Table S3** Feature peaks information ranking first in the principle component analysis

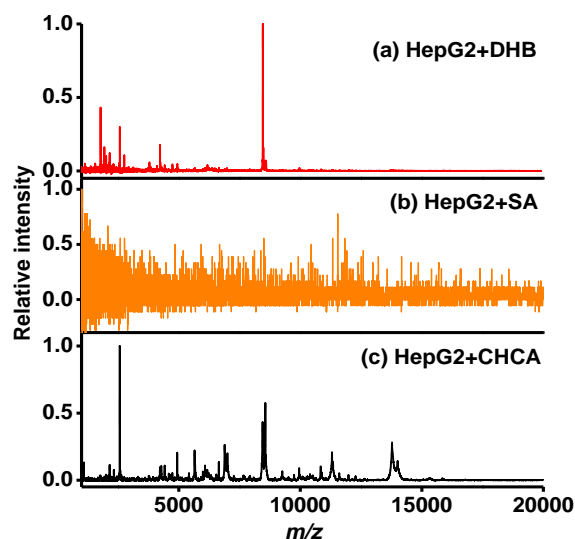

**Figure S1.** Normalized MALDI mass spectra of HepG2 cells with different organic matrix. (a) DHB (2, 5-Dihydroxybenzoic acid), (b) SA (Sinapic acid), (c) CHCA ( $\alpha$ -Cyano-4-hydroxycinnamic acid). All matrix were prepared as saturated solutions whose solvent was a mixture of water, ACN and TFA (50:50:0.1, v/v/v). Spectra have been normalized by dividing the max peak value in each spectrum.

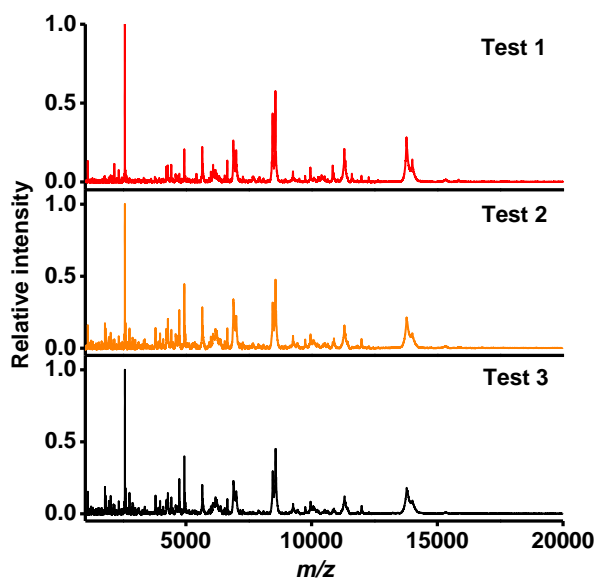

**Figure S2.** Typical normalized MALDI mass spectra of HepG2 cells acquired in different independent tests. The three tests were completed in three different days and the samples were obtained in the same culture generation. Spectra have been normalized by dividing the max peak value in each spectrum.

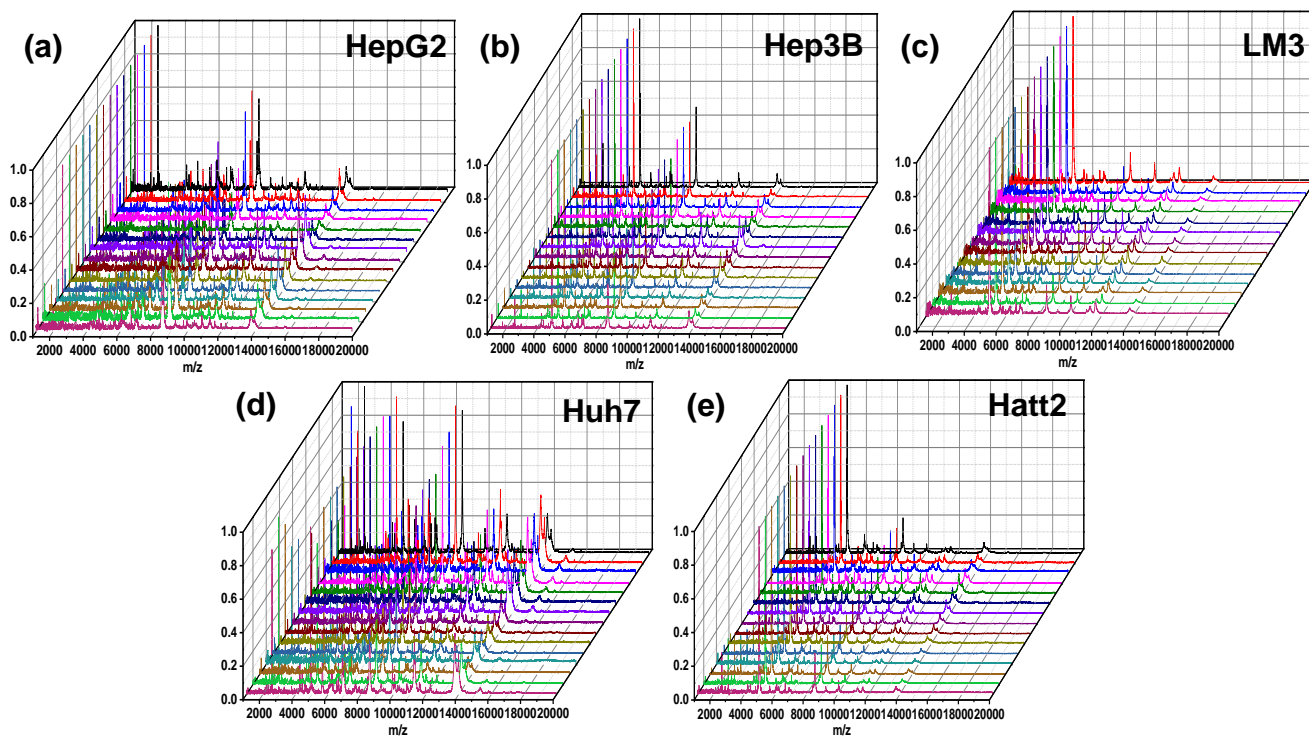

**Figure S3.** Normalized MALDI mass spectra of five types of hepatocellular cancer cells (HCC cells). (a) HepG2, (b) Hep3B, (c) LM3, (d) Huh7, (e) Hatt2. For each type of cells, spectra were acquired from 15 cell samples, which were gathered from five continuous generations with three replicates in each generation. Spectra have been normalized by dividing the max peak value in each spectrum.

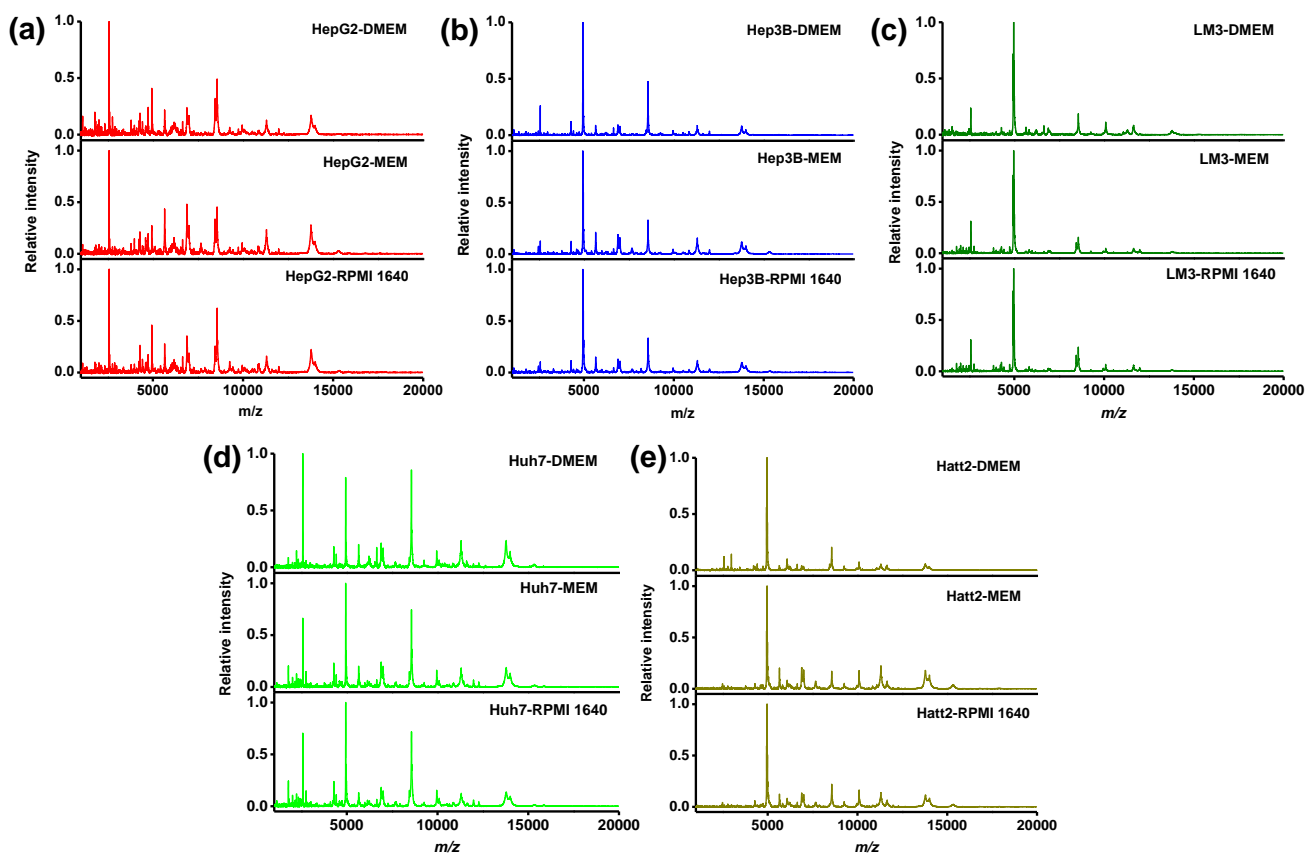

**Figure S4.** Normalized MALDI mass spectra of five types HCC cells cultured in DMEM, MEM and RPMI 1640 media. (a) HepG2, (b) Hep3B, (c) LM3, (d) Huh7, (e) Hatt2. Mass spectra of cells cultured in DMEM are the same with those in Figure 2.

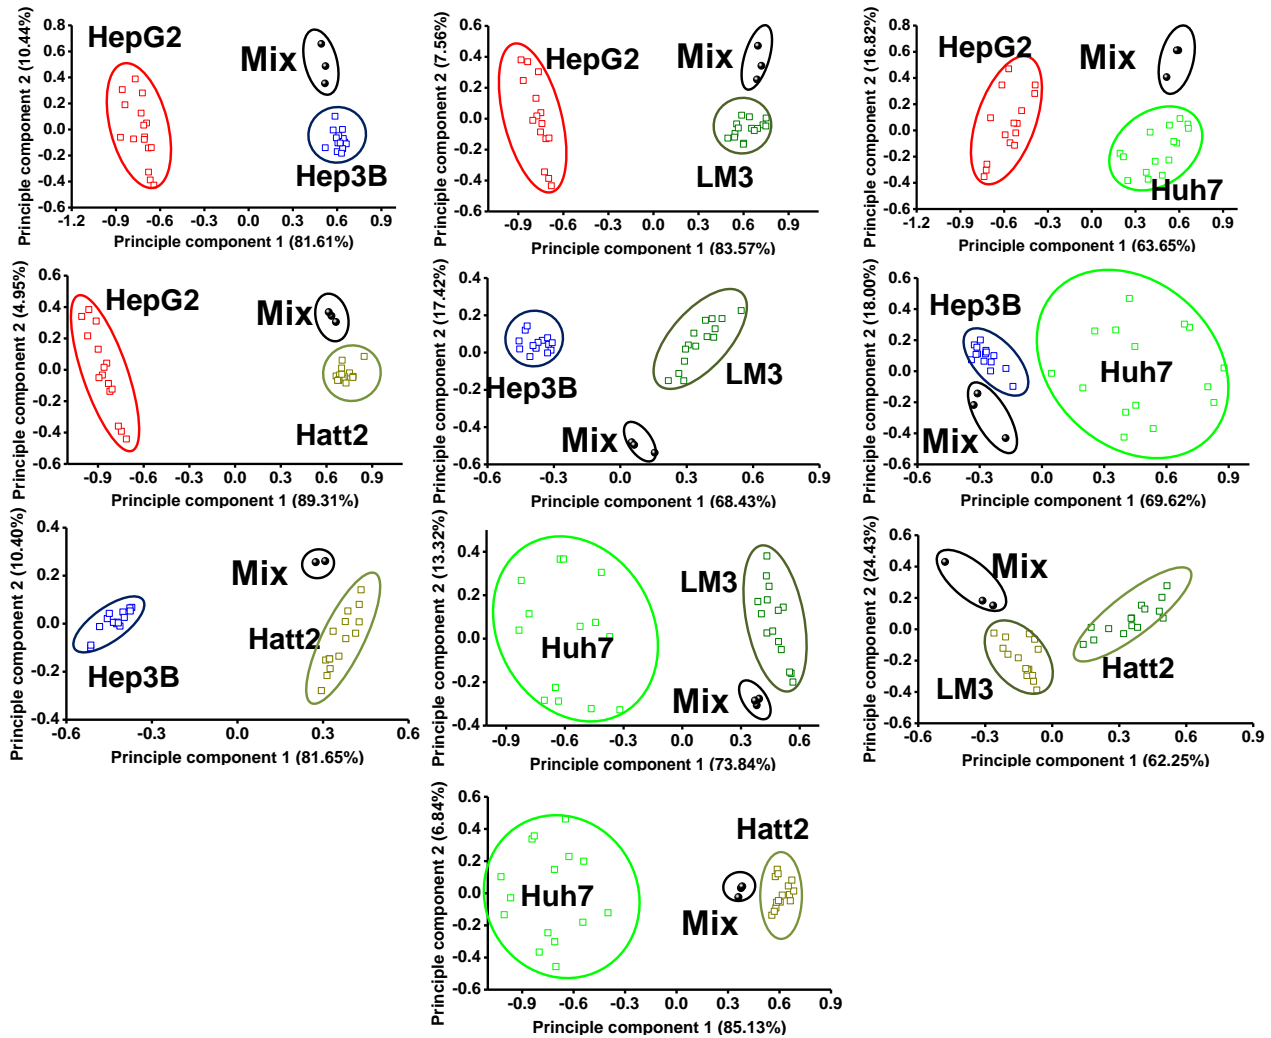

**Figure S5.** Principle component analysis (PCA) of cell mixture and pure cells. In each graph, “Mix” is referred to the cell mixture composed of two kinds of HCC cells with ratio =1:1. PCA process was all based on the 70 feature peaks selected by ClinproTools ( $p < 0.01$ ). The data of pure cells used in this figure are the same with those in Figure 3b and the culture medium was DMEM.

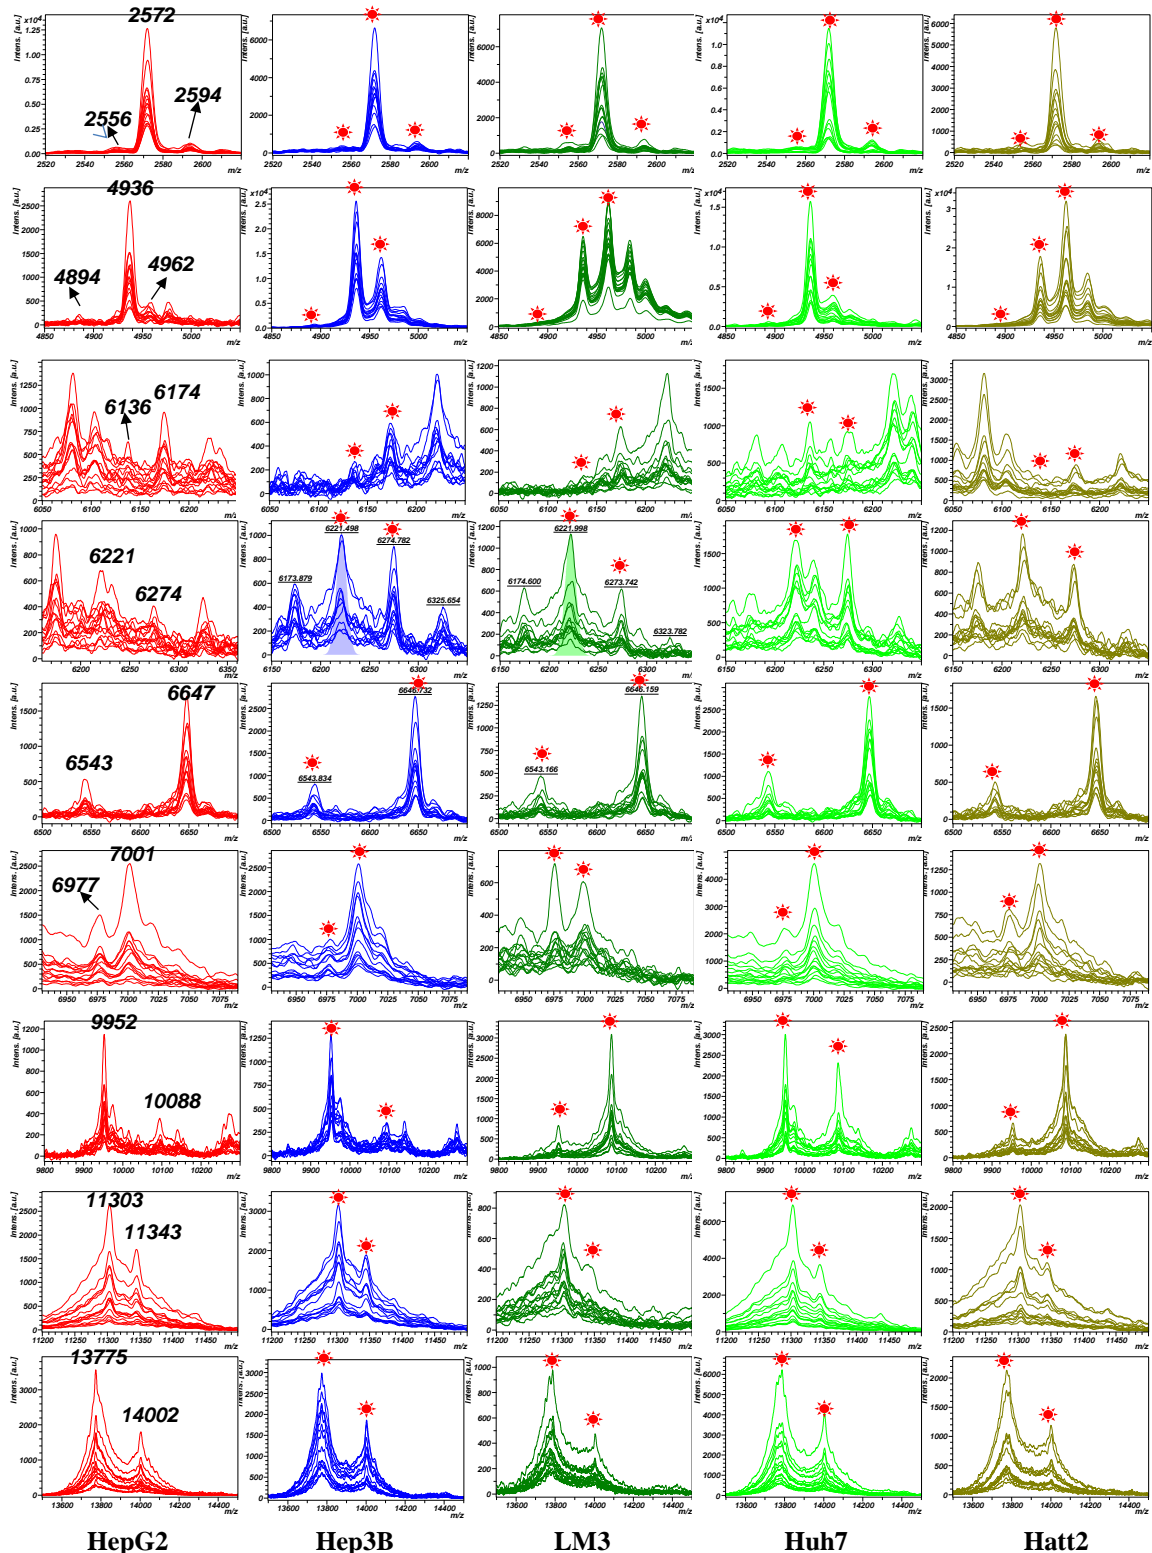

**Figure S6.** Magnified mass spectra of five type HCC cells at 11 pairs of dual-peaks whose RSD < 25% in each type of cells. The 11 pairs of dual peaks are listed:  $m/z = 2556$  vs  $2572$ ,  $m/z = 2556$  vs  $2594$ ,  $m/z = 4894$  vs  $4962$ ,  $m/z = 4936$  vs  $4962$ ,  $m/z = 6136$  vs  $6174$ ,  $m/z = 6221$  vs  $6274$ ,  $m/z = 6543$  vs  $6647$ ,  $m/z = 6977$  vs  $7001$ ,  $m/z = 9952$  vs  $10088$ ,  $m/z = 11303$  vs  $11343$ ,  $m/z = 13775$  vs  $14002$ .

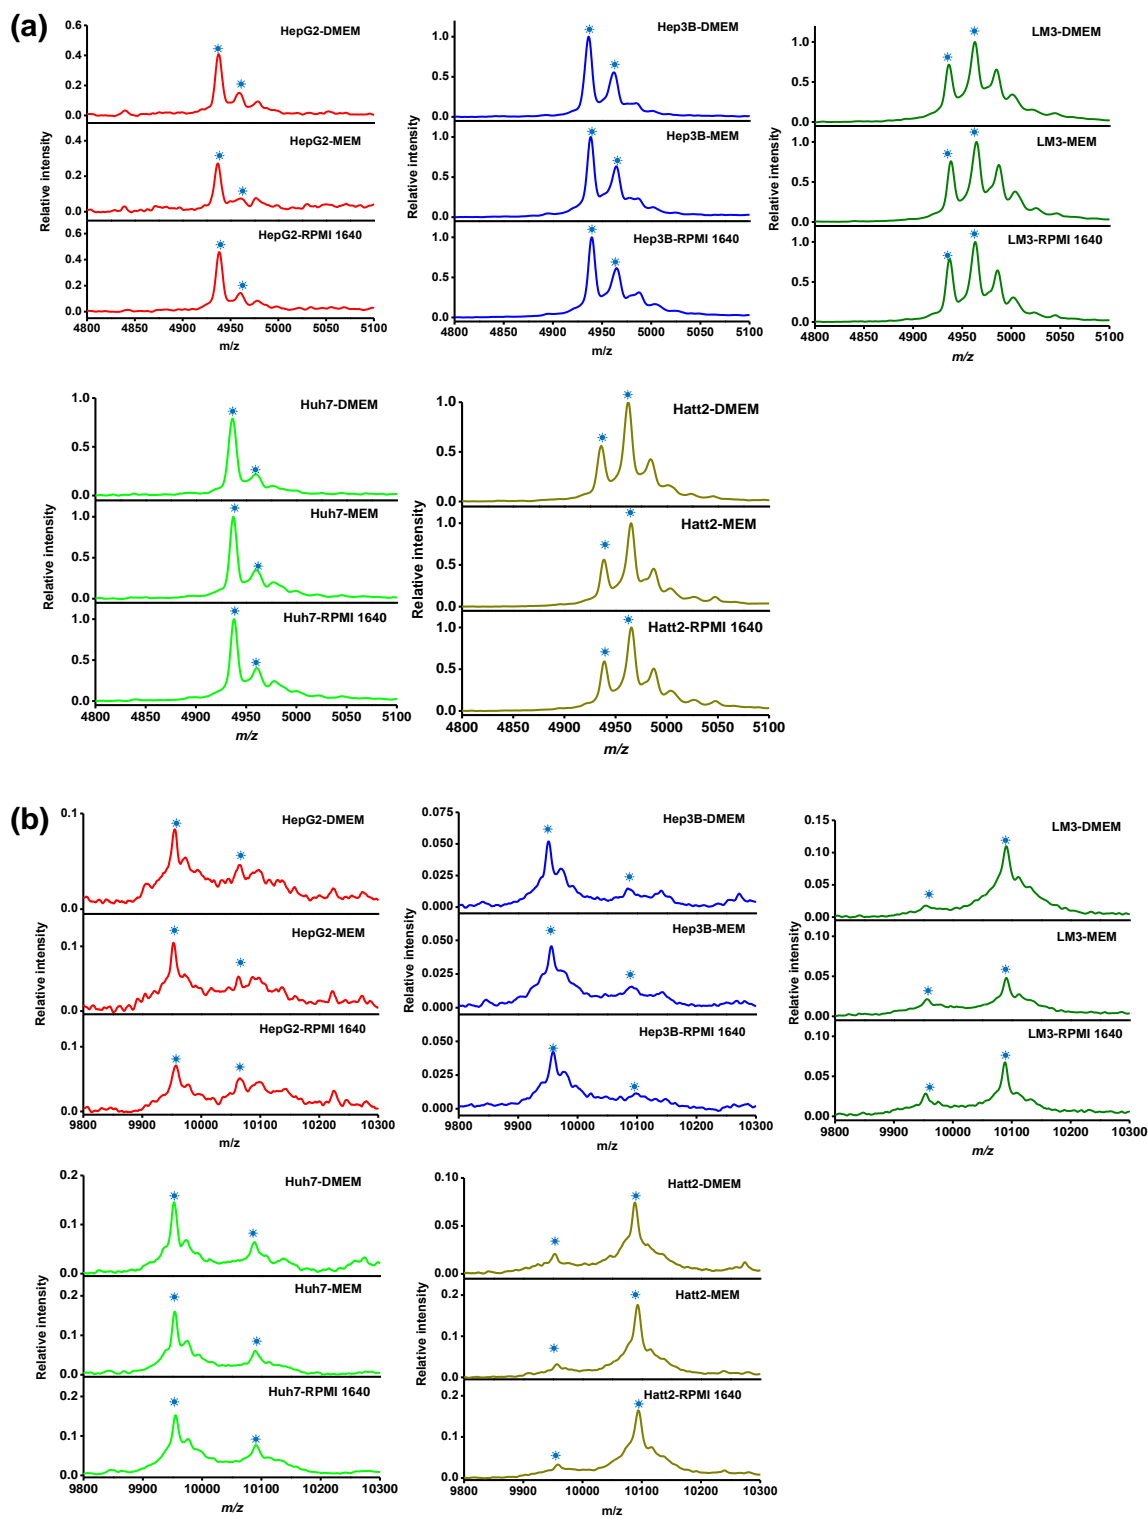

**Figure S7.** Magnified mass spectra at (a)  $m/z = 4962$  vs  $4936$ , (b)  $m/z = 10088$  vs  $9952$  of five type HCC cells cultured in three different media (DMEM, MEM and RPMI 1640). Mass spectra of cells cultured in DMEM are the same with those in Figure 2.



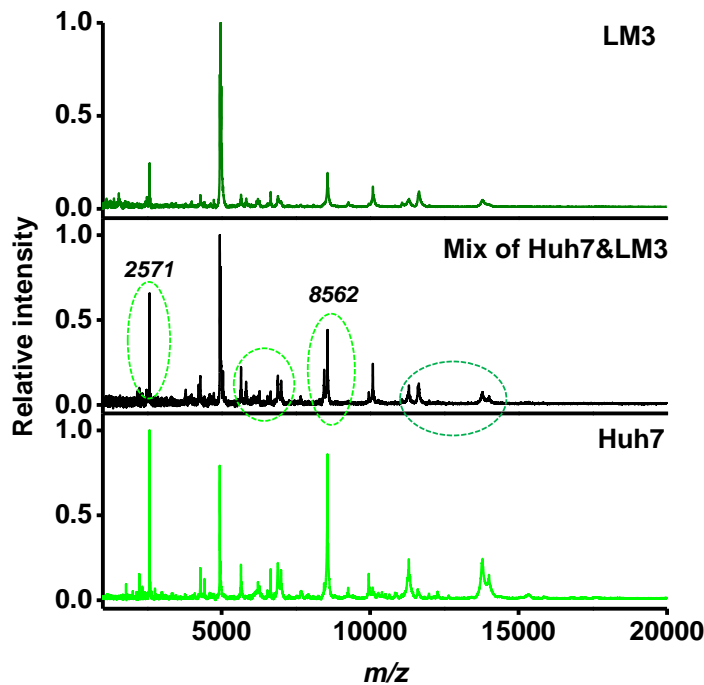

**Figure S8.** Typical Normalized MALDI mass spectra of (a) LM3, (b) mixture of Huh7 and LM3 with ratio =1:1 and (c) Huh7 cells cultured in DMEM. Mass spectra of Huh7 and LM3 cultured in DMEM are the same with those in Figure 2. The mass fingerprint of cell mixture seemed to overlay the spectra of Huh7 and LM3. For example, the relative intensity of the peak at  $m/z = 2571$ ,  $m/z = 8562$  in mixture sample were intermediate of those belonging to LM3 and Huh7 cells.

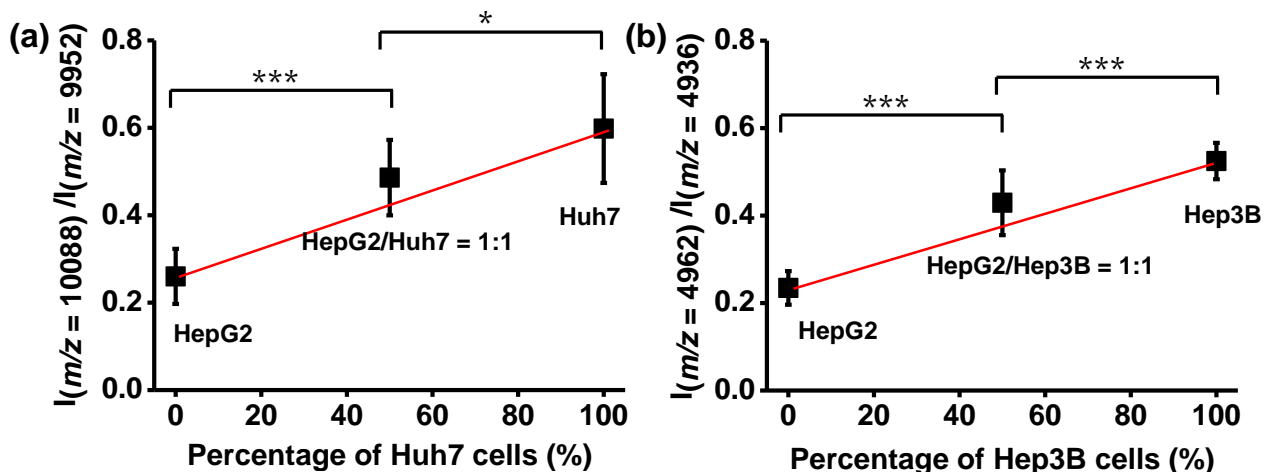

**Figure S9.** (a) The relationship between peak intensity ratio of  $m/z = 10088$  to  $m/z = 9952$  and percentage of Huh 7 cell in the cell mixture of Huh7 and HepG2 cells. (b) Relationship between peak intensity ratio of  $m/z = 4962$  to  $m/z = 4936$  and percentage of Hep3B cell in the cell mixture of Hep3B and HepG2. The ratio of peak pairs for pure cells was an averaged value calculated from 15 replicates while mixture was replicated for 3 tests.

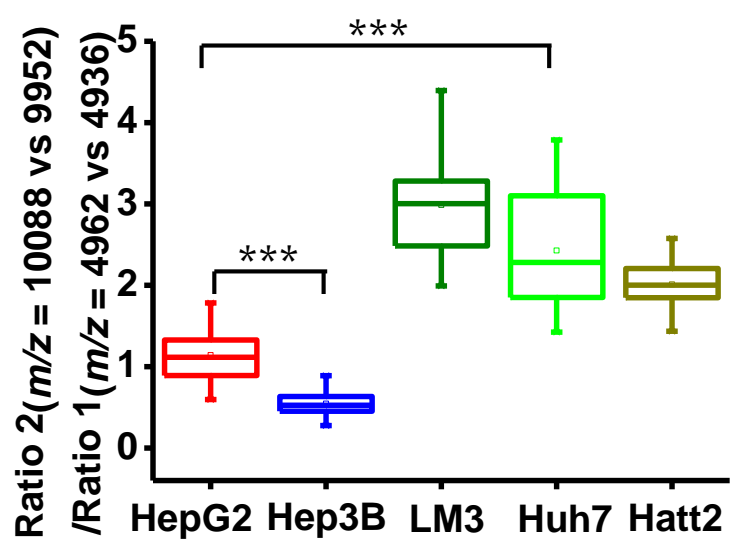

| Cell type      | P value of Ratio 2/Ratio 1 |
|----------------|----------------------------|
| HepG2 vs Hep3B | 2.04E-06                   |
| HepG2 vs LM3   | 7.10E-11                   |
| HepG2 vs Huh7  | 7.28E-07                   |
| HepG2 vs Hatt2 | 3.79E-07                   |
| Hep3B vs LM3   | 7.70E-15                   |
| Hep3B vs Huh7  | 7.86E-11                   |
| Hep3B vs Hatt2 | 7.27E-13                   |
| LM3 vs Huh7    | 0.027341                   |
| LM3 vs Hatt2   | 0.000209                   |
| Huh7 vs Hatt2  | 0.196562                   |

**Figure S10.** Ratio of two ratio values (Ratio 1 =  $I_{(m/z=4962)} / I_{(m/z=4936)}$ , Ratio 2 =  $I_{(m/z=10088)} / I_{(m/z=9952)}$ ) in five types of HCC cells and the *P* value results between these cells.

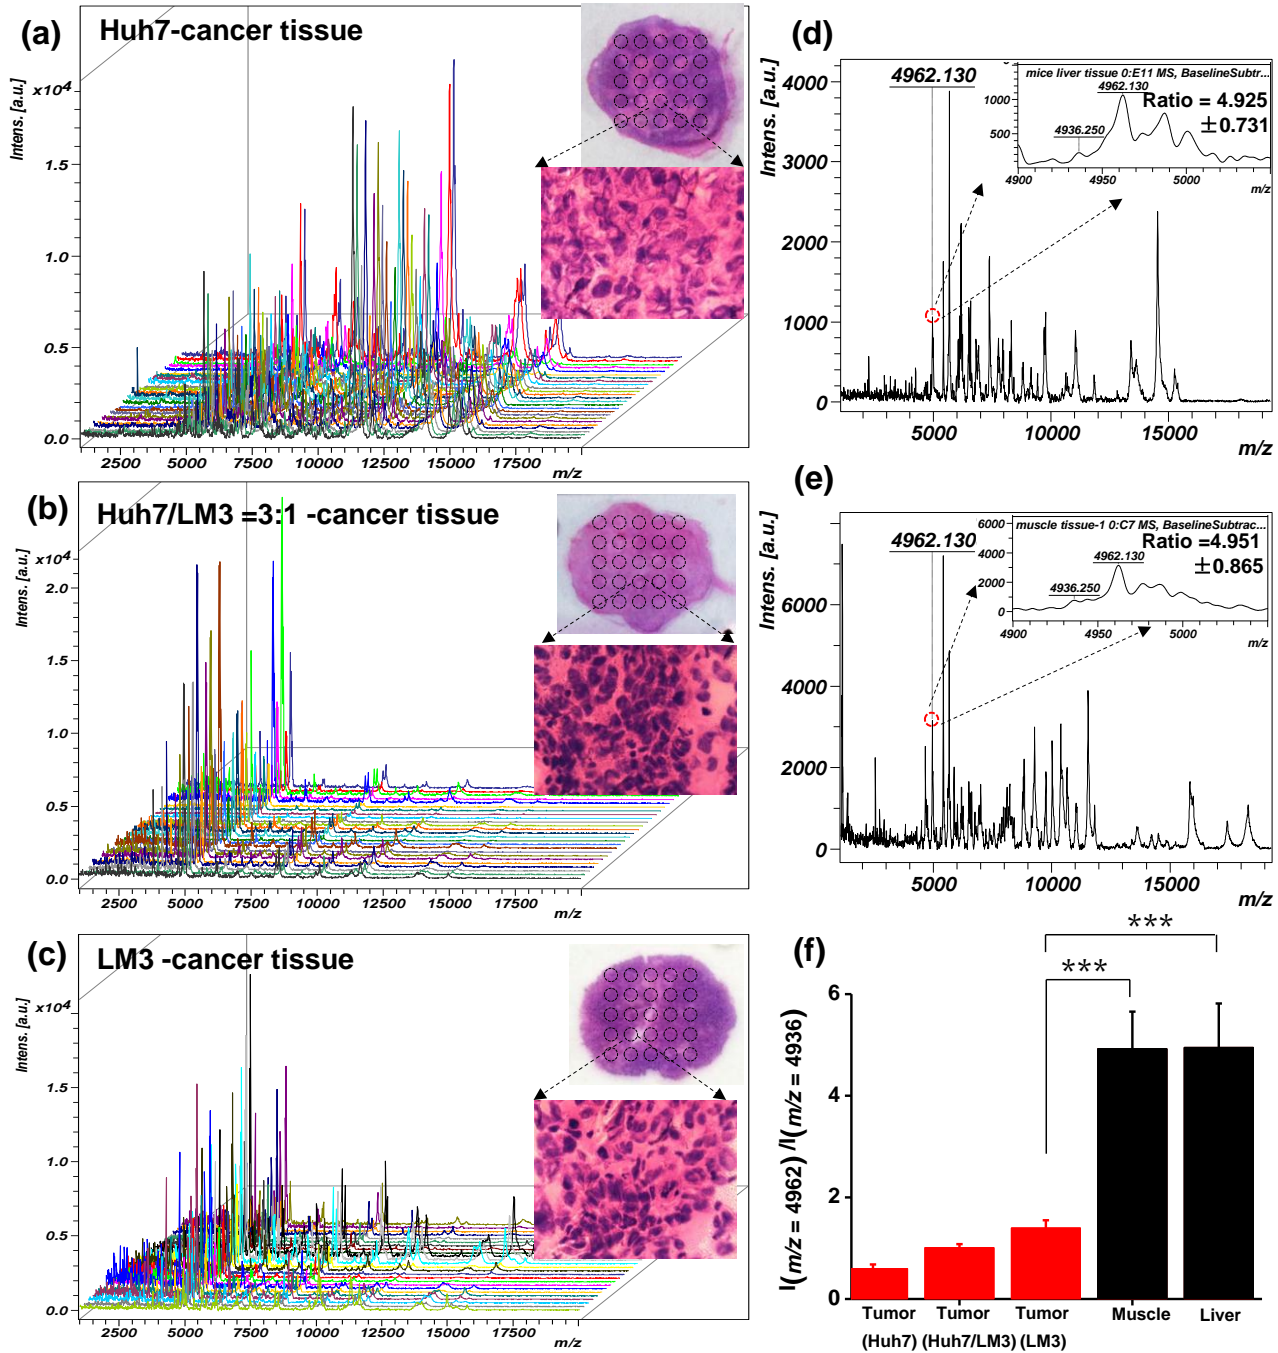

**Figure S11.** (a~c) MALDI mass spectra of the tissues originate from (a) pure Huh7 cells, (c) pure LM3 cells and (b) mixed cells with a ratio of Huh7/LM3 = 3:1. Insets in (a), (b), (c) are the symbolic images of the 5×5 array for MALDI detection on the tissue section which have been stained by haematoxylin and eosin for visualization. (d~e) MALDI mass spectra of (d) nude mice liver tissue and (e) nude mice muscle tissue. Insets in (d) and (e) are the magnified mass spectra at the  $m/z = 4936$  and  $m/z = 4962$ . (f) Intensity ratio of  $m/z = 4962$  to  $m/z = 4936$  from different tissues in the model mouse. The ratio values were calculated as  $I_{(m/z = 4962)} / I_{(m/z = 4936)}$  from a 5×5 spots array on the tissues. The ratio value for mice liver tissue and mice muscle tissue was  $4.925 \pm 0.731$  and  $4.951 \pm 0.865$ , respectively.

(a)

Thymosin  $\beta$  4 Ac-SDKPDMAEIEKFDKSKLKKKTETQEKNPLPSKETIEQEKQAGES

Thymosin  $\beta$  10 Ac-ADKPDmGEIASFDKAKLKKKTETQEKNLPTKETIEQEKRSEIS

(b)

| Protein name        | Score  | Coverage                               | # PSMs     |                  |          |
|---------------------|--------|----------------------------------------|------------|------------------|----------|
| Thymosin-beta 4     | 94.74  | 90.70                                  | 33         |                  |          |
| Sequence            | # PSMs | Modifications                          | MH+ [Da]   | $\Delta$ M [ppm] | RT [min] |
| TETQEKNPLPSKETIEQEK | 11     |                                        | 2229.16240 | 16.96            | 20.42    |
| sDKPDMAEIEKFDK      | 14     | S1(Acetyl)                             | 1694.82529 | 18.30            | 62.36    |
| sDKPDMAEIEK         | 3      | S1(Acetyl)                             | 1304.62749 | 18.05            | 27.46    |
| NPLPSKETIEQEK       | 2      |                                        | 1512.81816 | 18.30            | 19.48    |
| NPLPSKETIEQEKQAGES  | 1      |                                        | 1985.02141 | 19.71            | 23.50    |
| sDKPDmAEIEKFDK      | 1      | S1(Acetyl); M6(Oxidation)              | 1710.81736 | 16.46            | 34.16    |
| kTETQEknPLPSK       | 1      | K1(GlyGly); K7(GlyGly); N8(Deamidated) | 1728.89507 | 10.84            | 89.38    |
| Accession           | Score  | Coverage                               | # PSMs     |                  |          |
| Thymosin-beta 10    | 42.82  | 81.40                                  | 15         |                  |          |
| Sequence            | # PSMs | Modifications                          | MH+ [Da]   | $\Delta$ M [ppm] | RT [min] |
| aDKPDMGEIASFDK      | 7      | A1(Acetyl)                             | 1565.74407 | 18.37            | 76.36    |
| NLPTKETIEQEK        | 2      |                                        | 1530.82927 | 18.44            | 18.66    |
| NLPTKETIEQEK R      | 1      |                                        | 1686.92795 | 15.29            | 16.42    |
| aDKPDmGEIASFDK      | 2      | A1(Acetyl); M6(Oxidation)              | 1581.74016 | 18.93            | 44.57    |
| nLPTKETIEQEK        | 1      | N1(Deamidated)                         | 1531.81133 | 17.15            | 22.85    |
| nLPTKETIEqEK        | 1      | N1(Deamidated); Q11(Deamidated)        | 1532.74578 | -15.20           | 18.61    |
| kTETQEKNLPTK        | 1      | K1(GlyGly); K7(GlyGly)                 | 1745.89336 | -5.45            | 56.98    |

(c)

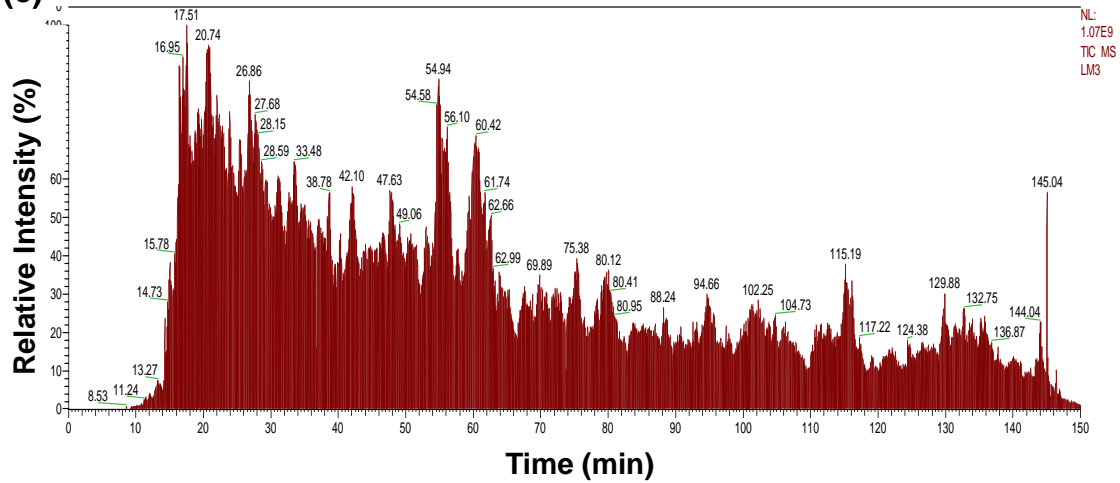

(d-1)

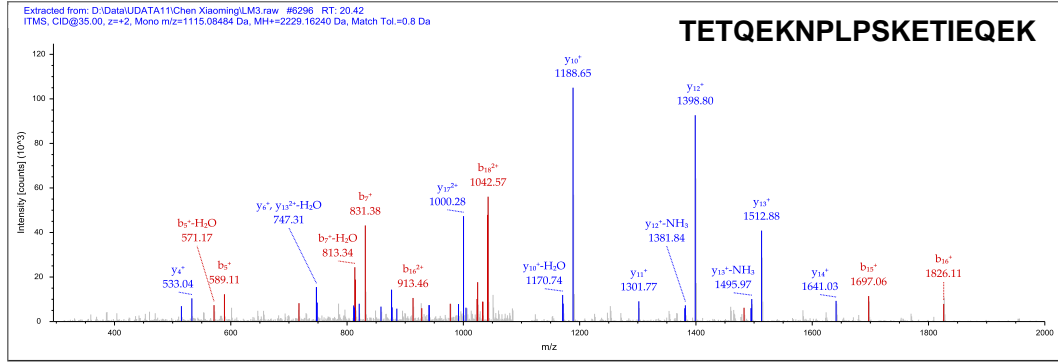

(d-2)

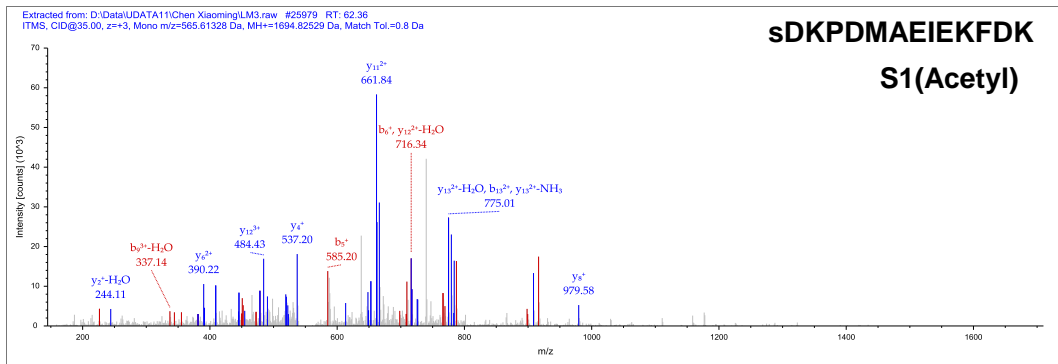

(d-3)

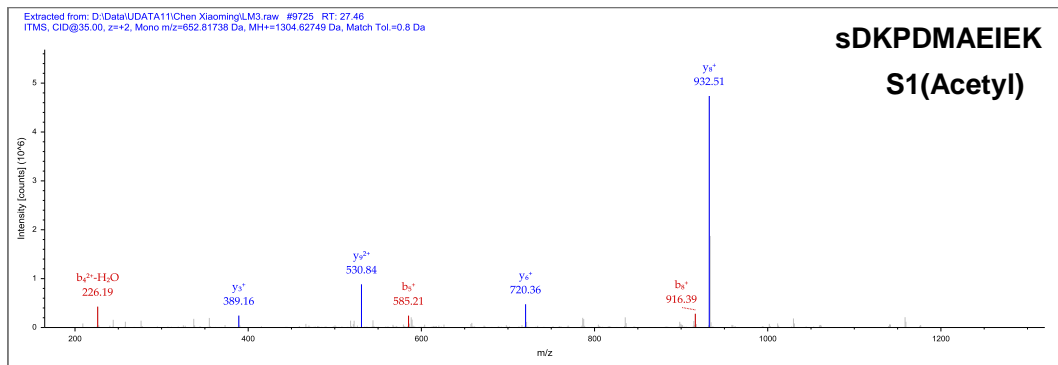

(d-4)

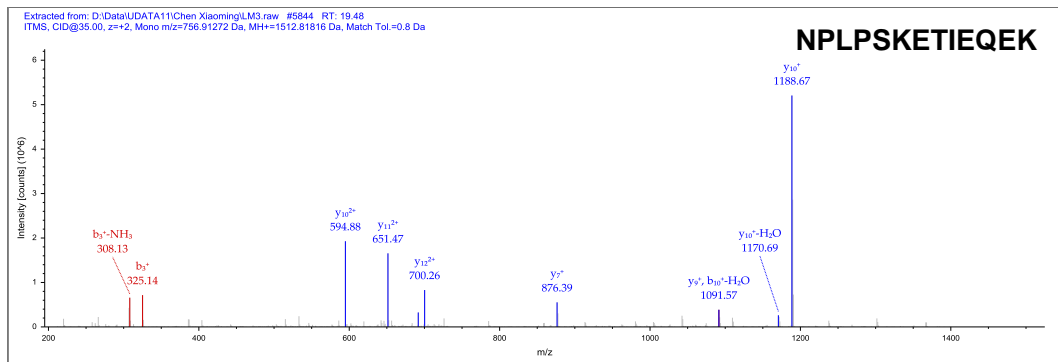

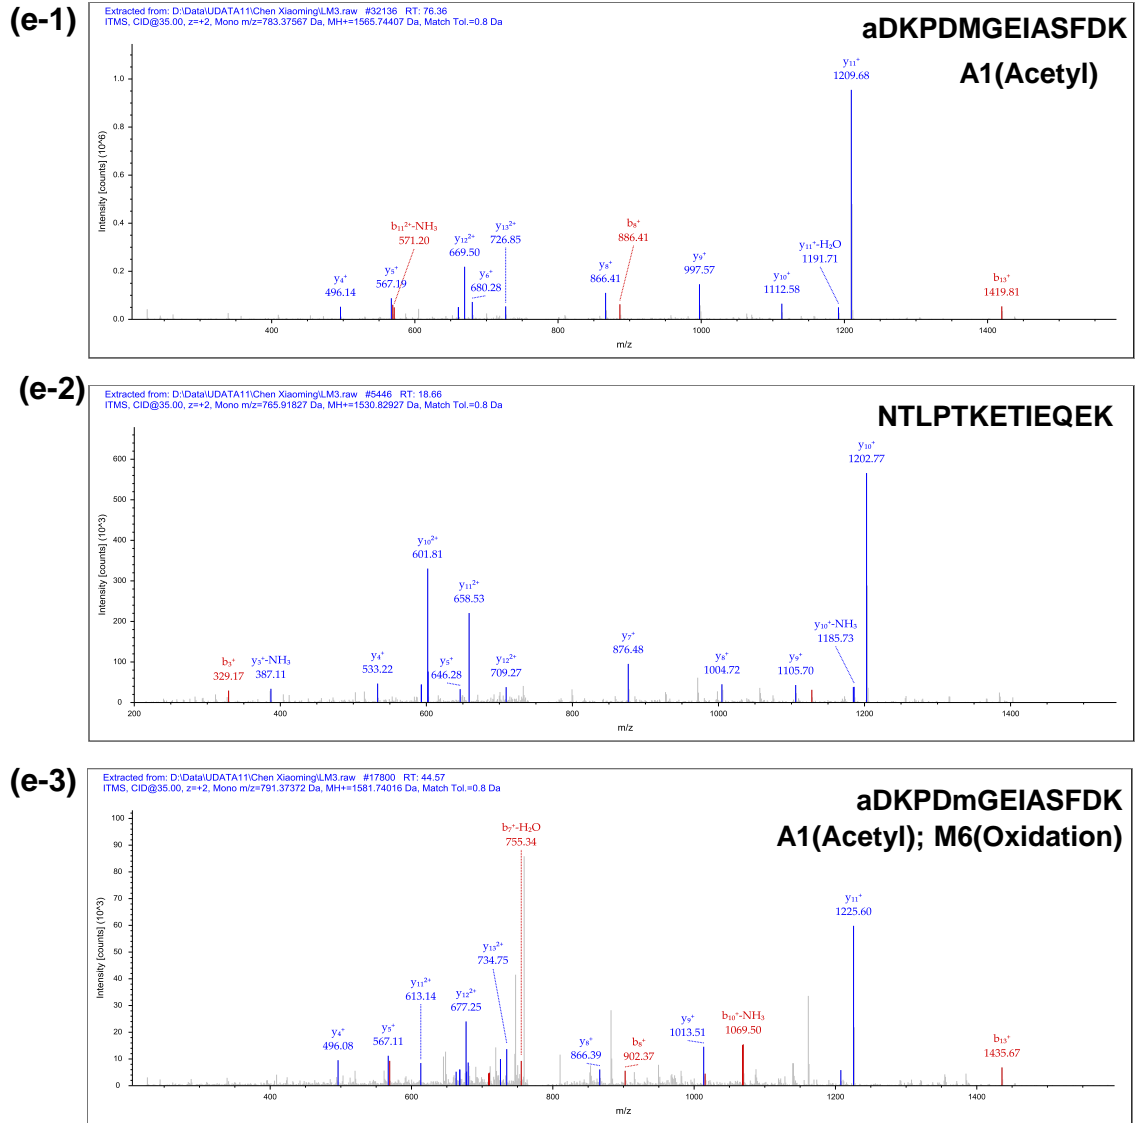

**Figure S12.** LC-MS/MS identification results of thymosin  $\beta$ 4 and thymosin  $\beta$ 10. (a) Amino acid sequence of thymosin  $\beta$ 4 and thymosin  $\beta$ 10. (b) Information of the peptide sequence identified by LC-MS/MS. (c) Total ion current spectrum of the LM3 cell sample after trypsin lysis procedure. (d-e) MS/MS spectra of the identified peptide sequence belonging to (d) thymosin  $\beta$ 4 and (e) thymosin  $\beta$ 10 with high PSMs, respectively.

**Table S1.** Normalized intensity of 70 feature peaks from the mass spectra of five types of HCC cells selected by ClinproTools software

| m/z of 70 feature peaks | Normalized Intensity (Average value $\pm$ Error) |                   |                   |                   |                   |
|-------------------------|--------------------------------------------------|-------------------|-------------------|-------------------|-------------------|
|                         | HepG2                                            | Hep3B             | LM3               | Huh7              | Hatt2             |
| 1099.13                 | 0.129 $\pm$ 0.029                                | 0.058 $\pm$ 0.022 | 0.01 $\pm$ 0.011  | 0.048 $\pm$ 0.023 | 0.029 $\pm$ 0.016 |
| 1779.04                 | 0.052 $\pm$ 0.018                                | 0.018 $\pm$ 0.009 | 0.012 $\pm$ 0.014 | 0.046 $\pm$ 0.024 | 0.005 $\pm$ 0.007 |
| 2006.99                 | 0.058 $\pm$ 0.02                                 | 0.006 $\pm$ 0.007 | 0.019 $\pm$ 0.013 | 0.023 $\pm$ 0.017 | 0.007 $\pm$ 0.007 |
| 2154.19                 | 0.129 $\pm$ 0.027                                | 0.012 $\pm$ 0.006 | 0.04 $\pm$ 0.018  | 0.041 $\pm$ 0.018 | 0.017 $\pm$ 0.007 |
| 2227.23                 | /                                                | /                 | 0.009 $\pm$ 0.01  | 0.066 $\pm$ 0.044 | 0.004 $\pm$ 0.006 |
| 2328.43                 | 0.075 $\pm$ 0.011                                | 0.019 $\pm$ 0.004 | 0.043 $\pm$ 0.017 | 0.053 $\pm$ 0.019 | 0.017 $\pm$ 0.008 |
| 2349.52                 | 0.033 $\pm$ 0.007                                | 0.007 $\pm$ 0.005 | 0.026 $\pm$ 0.016 | 0.02 $\pm$ 0.014  | 0.018 $\pm$ 0.005 |
| 2467.37                 | 0.009 $\pm$ 0.014                                | 0.033 $\pm$ 0.007 | 0.023 $\pm$ 0.015 | 0.038 $\pm$ 0.006 | 0.013 $\pm$ 0.007 |
| 2482.81                 | 0.019 $\pm$ 0.016                                | 0.022 $\pm$ 0.01  | 0.029 $\pm$ 0.024 | 0.019 $\pm$ 0.012 | 0.022 $\pm$ 0.008 |
| 2555.58                 | 0.062 $\pm$ 0.012                                | 0.012 $\pm$ 0.007 | 0.041 $\pm$ 0.019 | 0.043 $\pm$ 0.012 | 0.012 $\pm$ 0.009 |
| 2571.90                 | 1 $\pm$ 0                                        | 0.221 $\pm$ 0.048 | 0.508 $\pm$ 0.191 | 0.658 $\pm$ 0.26  | 0.132 $\pm$ 0.065 |
| 2593.84                 | 0.11 $\pm$ 0.019                                 | 0.023 $\pm$ 0.006 | 0.053 $\pm$ 0.023 | 0.073 $\pm$ 0.033 | 0.017 $\pm$ 0.011 |
| 2634.26                 | 0.07 $\pm$ 0.023                                 | 0.001 $\pm$ 0.003 | 0.001 $\pm$ 0.005 | 0.016 $\pm$ 0.015 | 0.002 $\pm$ 0.004 |
| 2754.26                 | 0.031 $\pm$ 0.016                                | 0.008 $\pm$ 0.005 | 0.021 $\pm$ 0.013 | 0.035 $\pm$ 0.017 | 0.011 $\pm$ 0.008 |
| 2775.74                 | 0.005 $\pm$ 0.01                                 | 0.01 $\pm$ 0.007  | 0.011 $\pm$ 0.014 | 0.012 $\pm$ 0.011 | 0.031 $\pm$ 0.011 |
| 2978.37                 | /                                                | 0.03 $\pm$ 0.006  | 0.002 $\pm$ 0.007 | 0.024 $\pm$ 0.016 | 0.109 $\pm$ 0.035 |
| 3788.64                 | 0.028 $\pm$ 0.013                                | 0.001 $\pm$ 0.002 | 0.015 $\pm$ 0.013 | 0.024 $\pm$ 0.012 | 0.001 $\pm$ 0.004 |
| 3838.72                 | 0.005 $\pm$ 0.01                                 | 0.013 $\pm$ 0.008 | 0.024 $\pm$ 0.016 | /                 | 0.019 $\pm$ 0.004 |
| 3937.48                 | 0.015 $\pm$ 0.013                                | 0.021 $\pm$ 0.01  | 0.004 $\pm$ 0.008 | 0.016 $\pm$ 0.015 | 0.006 $\pm$ 0.006 |
| 4213.78                 | 0.019 $\pm$ 0.027                                | 0.023 $\pm$ 0.01  | 0.029 $\pm$ 0.016 | 0.003 $\pm$ 0.007 | 0.04 $\pm$ 0.006  |
| 4225.05                 | 0.1 $\pm$ 0.041                                  | 0.017 $\pm$ 0.009 | 0.023 $\pm$ 0.017 | 0.033 $\pm$ 0.013 | 0.033 $\pm$ 0.004 |
| 4281.40                 | 0.104 $\pm$ 0.03                                 | 0.097 $\pm$ 0.017 | 0.079 $\pm$ 0.011 | 0.157 $\pm$ 0.023 | 0.036 $\pm$ 0.006 |
| 4418.30                 | 0.119 $\pm$ 0.038                                | 0.047 $\pm$ 0.006 | 0.064 $\pm$ 0.025 | 0.121 $\pm$ 0.029 | 0.057 $\pm$ 0.009 |
| 4735.73                 | 0.05 $\pm$ 0.019                                 | 0.033 $\pm$ 0.007 | 0.049 $\pm$ 0.01  | 0.039 $\pm$ 0.017 | 0.038 $\pm$ 0.008 |
| 4894.11                 | 0.003 $\pm$ 0.007                                | 0.029 $\pm$ 0.009 | 0.038 $\pm$ 0.006 | 0.035 $\pm$ 0.011 | 0.021 $\pm$ 0.014 |
| 4936.25                 | 0.194 $\pm$ 0.053                                | 1 $\pm$ 0         | 0.711 $\pm$ 0.024 | 0.972 $\pm$ 0.066 | 0.588 $\pm$ 0.045 |
| 4962.13                 | 0.045 $\pm$ 0.013                                | 0.525 $\pm$ 0.041 | 1 $\pm$ 0         | 0.244 $\pm$ 0.026 | 1 $\pm$ 0         |
| 4983.82                 | 0.027 $\pm$ 0.02                                 | 0.144 $\pm$ 0.062 | 0.403 $\pm$ 0.042 | 0.121 $\pm$ 0.013 | 0.467 $\pm$ 0.106 |
| 4999.71                 | 0.007 $\pm$ 0.011                                | 0.062 $\pm$ 0.034 | 0.163 $\pm$ 0.052 | 0.049 $\pm$ 0.026 | 0.195 $\pm$ 0.052 |
| 5044.08                 | 0.002 $\pm$ 0.007                                | 0.007 $\pm$ 0.012 | 0.058 $\pm$ 0.011 | 0.032 $\pm$ 0.017 | 0.06 $\pm$ 0.015  |
| 5068.20                 | 0.012 $\pm$ 0.014                                | 0.006 $\pm$ 0.01  | 0.02 $\pm$ 0.017  | 0.022 $\pm$ 0.013 | 0.027 $\pm$ 0.016 |
| 5419.21                 | 0.043 $\pm$ 0.013                                | 0.016 $\pm$ 0.008 | /                 | 0.01 $\pm$ 0.011  | 0.001 $\pm$ 0.002 |

|                 |             |             |             |             |             |
|-----------------|-------------|-------------|-------------|-------------|-------------|
| <b>5608.56</b>  | 0.036±0.01  | 0.021±0.008 | 0.02±0.012  | 0.028±0.02  | 0.008±0.006 |
| <b>5650.12</b>  | 0.192±0.063 | 0.103±0.03  | 0.08±0.032  | 0.261±0.107 | 0.05±0.024  |
| <b>5670.59</b>  | 0.094±0.041 | 0.054±0.026 | 0.014±0.022 | 0.123±0.06  | 0.026±0.015 |
| <b>5991.42</b>  | 0.055±0.028 | 0.014±0.007 | 0.015±0.008 | 0.023±0.011 | 0.014±0.005 |
| <b>6080.82</b>  | 0.123±0.048 | 0.001±0.003 | /           | 0.033±0.022 | 0.086±0.018 |
| <b>6104.03</b>  | 0.08±0.045  | /           | /           | 0.023±0.02  | 0.051±0.014 |
| <b>6136.22</b>  | 0.055±0.023 | 0.008±0.005 | 0.003±0.006 | 0.049±0.017 | 0.015±0.01  |
| <b>6174.32</b>  | 0.077±0.024 | 0.025±0.006 | 0.029±0.014 | 0.047±0.02  | 0.03±0.006  |
| <b>6221.52</b>  | 0.058±0.024 | 0.032±0.01  | 0.052±0.021 | 0.113±0.017 | 0.039±0.008 |
| <b>6274.02</b>  | 0.026±0.022 | 0.03±0.007  | 0.033±0.008 | 0.089±0.021 | 0.031±0.01  |
| <b>6325.26</b>  | 0.033±0.017 | 0.013±0.005 | 0.001±0.002 | 0.029±0.017 | 0.007±0.006 |
| <b>6543.21</b>  | 0.03±0.019  | 0.024±0.007 | 0.022±0.015 | 0.053±0.015 | 0.017±0.006 |
| <b>6646.69</b>  | 0.149±0.072 | 0.079±0.025 | 0.088±0.019 | 0.187±0.038 | 0.059±0.012 |
| <b>6889.47</b>  | 0.185±0.079 | 0.1±0.036   | 0.053±0.021 | 0.248±0.107 | 0.046±0.022 |
| <b>6947.02</b>  | 0.059±0.042 | 0.029±0.019 | 0.018±0.017 | 0.08±0.044  | 0.017±0.012 |
| <b>6976.82</b>  | 0.101±0.029 | 0.039±0.01  | 0.027±0.016 | 0.102±0.032 | 0.023±0.01  |
| <b>7000.97</b>  | 0.139±0.058 | 0.081±0.034 | 0.038±0.019 | 0.2±0.085   | 0.033±0.021 |
| <b>7920.40</b>  | 0.024±0.012 | 0.017±0.016 | 0.003±0.006 | 0.036±0.034 | /           |
| <b>8448.24</b>  | 0.429±0.187 | 0.047±0.006 | 0.09±0.016  | 0.108±0.017 | 0.06±0.012  |
| <b>8469.44</b>  | 0.165±0.091 | 0.031±0.005 | 0.053±0.018 | 0.061±0.018 | 0.035±0.009 |
| <b>8562.24</b>  | 0.476±0.138 | 0.451±0.028 | 0.506±0.056 | 0.795±0.083 | 0.207±0.025 |
| <b>9513.30</b>  | 0.013±0.011 | /           | /           | 0.013±0.014 | 0±0.001     |
| <b>9743.44</b>  | 0.032±0.013 | /           | /           | 0.004±0.007 | /           |
| <b>9952.93</b>  | 0.079±0.02  | 0.047±0.009 | 0.04±0.004  | 0.141±0.028 | 0.02±0.003  |
| <b>10088.74</b> | 0.02±0.007  | 0.013±0.003 | 0.166±0.029 | 0.086±0.03  | 0.075±0.024 |
| <b>10274.70</b> | 0.022±0.014 | 0.01±0.004  | 0.014±0.008 | 0.033±0.009 | 0.011±0.003 |
| <b>10396.53</b> | 0.036±0.013 | /           | 0.013±0.004 | 0.027±0.011 | /           |
| <b>10517.59</b> | 0.034±0.008 | 0.02±0.003  | 0.01±0.006  | 0.012±0.011 | 0.003±0.003 |
| <b>10838.80</b> | 0.078±0.026 | 0.034±0.01  | 0.015±0.007 | 0.04±0.015  | 0.007±0.003 |
| <b>10885.67</b> | 0.047±0.012 | 0.012±0.005 | /           | 0.032±0.012 | 0.004±0.003 |
| <b>11069.65</b> | 0.004±0.015 | /           | 0.049±0.014 | 0.029±0.01  | 0.022±0.009 |
| <b>11302.87</b> | 0.151±0.079 | 0.099±0.041 | 0.061±0.029 | 0.273±0.128 | 0.049±0.029 |
| <b>11343.04</b> | 0.095±0.045 | 0.061±0.031 | 0.021±0.018 | 0.147±0.07  | 0.029±0.015 |
| <b>11603.55</b> | 0.038±0.012 | 0.015±0.004 | 0.143±0.016 | 0.051±0.012 | 0.031±0.007 |
| <b>11981.62</b> | 0.03±0.009  | 0.027±0.007 | 0.017±0.004 | 0.031±0.006 | 0.005±0.003 |
| <b>12273.26</b> | 0.021±0.012 | 0.007±0.001 | 0.001±0.004 | 0.048±0.014 | 0.008±0.002 |
| <b>13774.69</b> | 0.208±0.101 | 0.099±0.038 | 0.062±0.024 | 0.259±0.103 | 0.058±0.027 |



|                 |           |              |              |              |              |
|-----------------|-----------|--------------|--------------|--------------|--------------|
| <b>14002.40</b> | 0.1 ±0.05 | 0.061 ±0.027 | 0.031 ±0.014 | 0.162 ±0.073 | 0.031 ±0.016 |
|-----------------|-----------|--------------|--------------|--------------|--------------|

**Table S2.** *P* values calculated with Student's t test of the 11 pair dual-peaks between each two type of five types of HCC cells

| <i>P</i> values of 11 pair dual-peaks |              |              |              |              |              |              |              |              |               |                |                |
|---------------------------------------|--------------|--------------|--------------|--------------|--------------|--------------|--------------|--------------|---------------|----------------|----------------|
| Cell mixture type                     | 2556 vs 2572 | 2556 vs 2594 | 4894 vs 4962 | 4936 vs 4962 | 6136 vs 6174 | 6221 vs 6274 | 6543 vs 6647 | 6977 vs 7001 | 9952 vs 10088 | 11303 vs 11343 | 13774 vs 14002 |
| <b>HepG2 vs Hep3B</b>                 | 7.935E-04    | 8.067E-01    | 1.678E-13    | 4.786E-18    | 4.244E-12    | 1.333E-05    | 3.905E-03    | 2.235E-06    | 3.832E-01     | 9.065E-02      | 1.844E-08      |
| <b>HepG2 vs LM3</b>                   | 1.306E-05    | 4.270E-01    | 2.447E-19    | 1.066E-33    | 4.913E-15    | 7.557E-02    | 8.276E-04    | 5.518E-03    | 7.928E-17     | 2.338E-08      | 9.494E-02      |
| <b>HepG2 vs Huh7</b>                  | 1.744E-01    | 9.702E-01    | 3.176E-07    | 1.509E-01    | 2.068E-04    | 4.547E-04    | 5.016E-02    | 4.457E-05    | 3.734E-10     | 7.508E-06      | 1.241E-09      |
| <b>HepG2 vs Hatt2</b>                 | 5.130E-05    | 8.164E-03    | 1.521E-10    | 4.556E-27    | 9.218E-01    | 8.300E-04    | 3.143E-02    | 6.704E-01    | 6.475E-17     | 5.298E-01      | 1.254E-20      |
| <b>Hep3B vs LM3</b>                   | 2.209E-01    | 6.989E-01    | 2.741E-07    | 6.911E-30    | 1.408E-03    | 1.089E-05    | 6.198E-01    | 2.561E-10    | 4.963E-08     | 1.211E-06      | 3.656E-06      |
| <b>Hep3B vs Huh7</b>                  | 8.361E-02    | 7.792E-01    | 2.372E-11    | 4.250E-19    | 6.016E-12    | 1.134E-02    | 2.063E-01    | 3.019E-01    | 5.243E-04     | 3.452E-03      | 4.539E-01      |
| <b>Hep3B vs Hatt2</b>                 | 2.500E-01    | 1.093E-02    | 8.543E-05    | 2.267E-24    | 2.264E-10    | 4.523E-03    | 3.095E-01    | 1.982E-05    | 1.873E-07     | 2.852E-01      | 1.941E-18      |
| <b>LM3 vs Huh7</b>                    | 7.640E-03    | 3.878E-01    | 5.905E-18    | 4.575E-35    | 3.485E-14    | 3.061E-04    | 6.889E-02    | 4.774E-09    | 2.146E-03     | 2.961E-05      | 2.769E-07      |
| <b>LM3 vs Hatt2</b>                   | 9.166E-01    | 1.630E-03    | 1.368E-01    | 2.799E-09    | 2.351E-13    | 7.588E-04    | 1.180E-01    | 3.748E-03    | 1.005E-03     | 1.215E-07      | 4.921E-20      |
| <b>Huh7 vs Hatt2</b>                  | 1.141E-02    | 7.690E-03    | 1.280E-09    | 3.229E-27    | 5.819E-04    | 6.076E-01    | 7.977E-01    | 3.282E-04    | 1.059E-05     | 1.040E-04      | 2.436E-18      |

$P < 0.01$  means the significant difference between cell types.

**Table S3.** Feature peaks information ranking first in the principle component analysis

| m/z of feature peaks | Coefficient of the peaks in p1 | m/z of feature peaks | Coefficient of the peaks in p2 |
|----------------------|--------------------------------|----------------------|--------------------------------|
| <b>4962.13</b>       | <b>0.59554</b>                 | <b>4936.25</b>       | <b>0.750937</b>                |
| 2571.90              | -0.5483                        | 8562.24              | 0.374808                       |
| 4983.82              | 0.265733                       | 2571.90              | -0.22771                       |
| 4936.25              | 0.205614                       | 4962.13              | -0.22539                       |
| 8562.24              | -0.19411                       | 8448.24              | -0.18991                       |
| 8448.24              | -0.18672                       | 4983.82              | -0.15158                       |
| 6889.47              | -0.1386                        | 11302.87             | 0.144088                       |
| 4999.71              | 0.120251                       | 5650.12              | 0.104848                       |
| 5650.12              | -0.11933                       | 6889.47              | 0.095461                       |
| 13774.69             | -0.11789                       | 7000.97              | 0.095435                       |
